# Supplementary material for: Rapid Classification of Petroleum Waxes: A Vis-NIR Spectroscopy and Machine Learning Approach
Source: MDPI journal article supplement (doi:10.3390/foods12183362), 2023-09-07
Supplement: s1 [file s1]

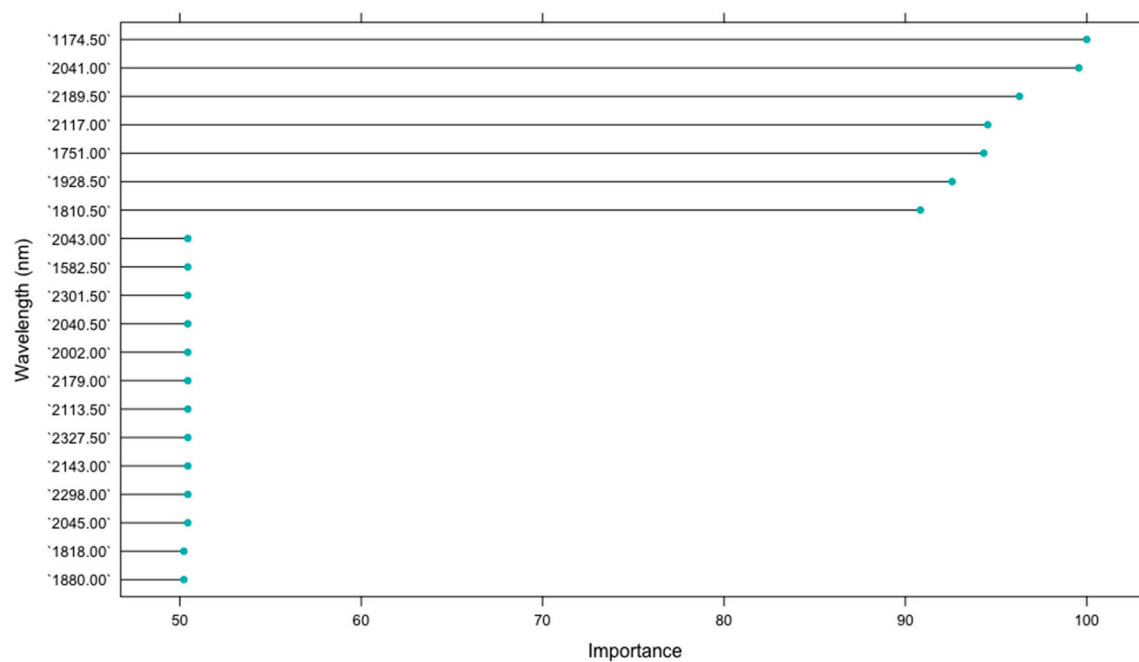

**Figure S1:** Graphical display of the 20 most important RF model features and their relative importance.
